# Supplementary material for: Phase Inversion and Interfacial Layer Microstructure in Emulsions Stabilized by Glycosurfactant Mixtures
Source: MDPI journal article supplement (doi:10.3390/nano11020331), 2021-01-27
Supplement: s1 [file s1]

## Supplementary Material

# Phase Inversion and Interfacial Layer Microstructure in Emulsions Stabilized by Glycosurfactant Mixtures

Rodolfo Esposito <sup>1</sup>, Domenico Cavasso <sup>1</sup>, Marcella Niccoli <sup>1</sup> and Gerardino D'Errico <sup>1,2,\*</sup>

<sup>1</sup> Department of Chemical Sciences, University of Naples Federico II, Via Cintia 4, Complesso Universitario di Monte Sant' Angelo, I-80126 Naples, Italy; rodolfo.esposito@unina.it (R.E.); domenico.cavasso@unina.it (D.C.); marcella.niccoli@unina.it (M.N.)

<sup>2</sup> CSGI, Consorzio Interuniversitario per lo Sviluppo dei Sistemi a Grande Interfase, Via della Lastruccia 3, I-50019 Sesto Fiorentino, Florence, Italy

\* Correspondence: gerardino.derrico@unina.it; Tel.: +39-081-674248

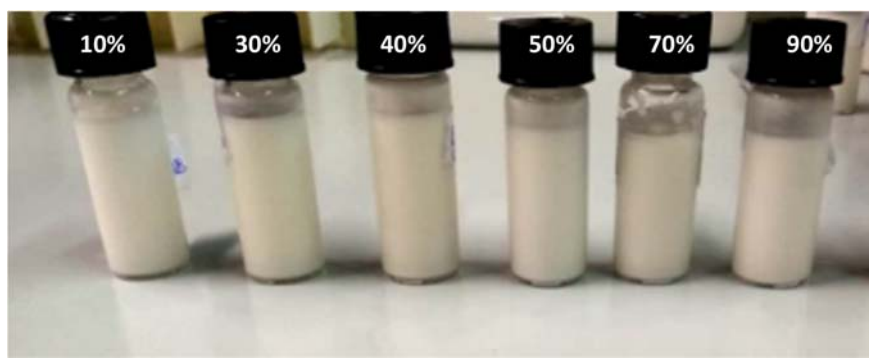

**Figure S1.** Water/L.O./(Tween80 + Span80) emulsion samples after 3 h from preparation. The total surfactant amount was fixed to 4% in weight with respect to the total sample amount and surfactant compositions was  $\alpha_{Span80} = 0.4$  in all samples. The oil content L.O.% is indicated in the labels.

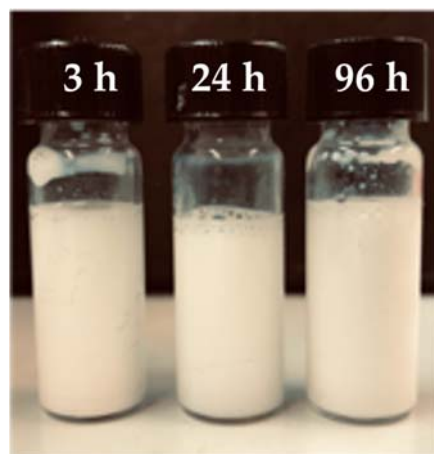

**Figure S2.** Water/L.O./(Tween80 + Span80) emulsion samples. The total surfactant amount was fixed to 4% in weight with respect to the total sample amount, surfactant composition and the oil content were  $\alpha_{Span80} = 0.4$  and L.O.% = 40 in all the samples. Time from preparation is indicated in the labels.

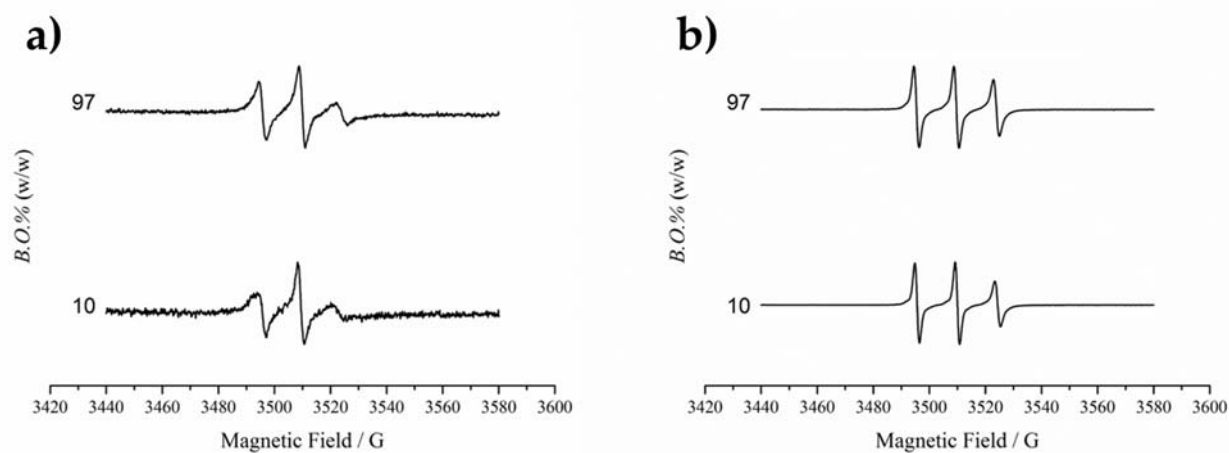

**Figure S3.** Electron paramagnetic resonance (EPR) spectra of 5-DSA (a) and 16-DSA (b) in water/B.O./ (Tween80+Span80) emulsions at 25 °C, recorded within 3 h from sample preparation. The total surfactant amount was fixed to 4% in weight with respect to the total sample amount and surfactant compositions was  $\alpha_{Span80} = 0.4$  in all samples. The oil content is indicated in the labels of the figures.
